# Supplementary material
Source: Royal Society of Chemistry journal article supplement (doi:10.1039/d6dd00067c)
Supplement: d6dd00067c1.pdf [file d6dd00067c1.pdf]

## Wide-Surface Furnace for *In Situ* X-Ray Diffraction of Combinatorial Samples using a High-Throughput Approach

Giulio Cordaro,<sup>\*a,b</sup> Juande Sirvent,<sup>c</sup> Cristian Mocuta,<sup>d</sup> Fjorelo Buzi,<sup>c</sup> Thierry Martin,<sup>a</sup> Federico Baiutti,<sup>c</sup> Alex Morata,<sup>c</sup> Albert Tarancòn,<sup>c</sup> Dominique Tiaudière<sup>d</sup> and Guilhem Dezanneau<sup>\*a</sup>

<sup>a</sup>Université Paris-Saclay, CentraleSupélec, CNRS, Gif-sur-Yvette 91190, France

<sup>b</sup>Chimie ParisTech, Université PSL, CNRS, Institut de Recherche de Chimie Paris (IRCP), Paris 75005, France

<sup>c</sup>Nanoionics and Fuel Cells group, Catalonia Institute for Energy Research (IREC), Jardins de les Dones de Negre 1, Barcelona 08930, Spain

<sup>d</sup>Synchrotron Soleil, Gif-Sur-Yvette 91192, France

### Supplementary Information

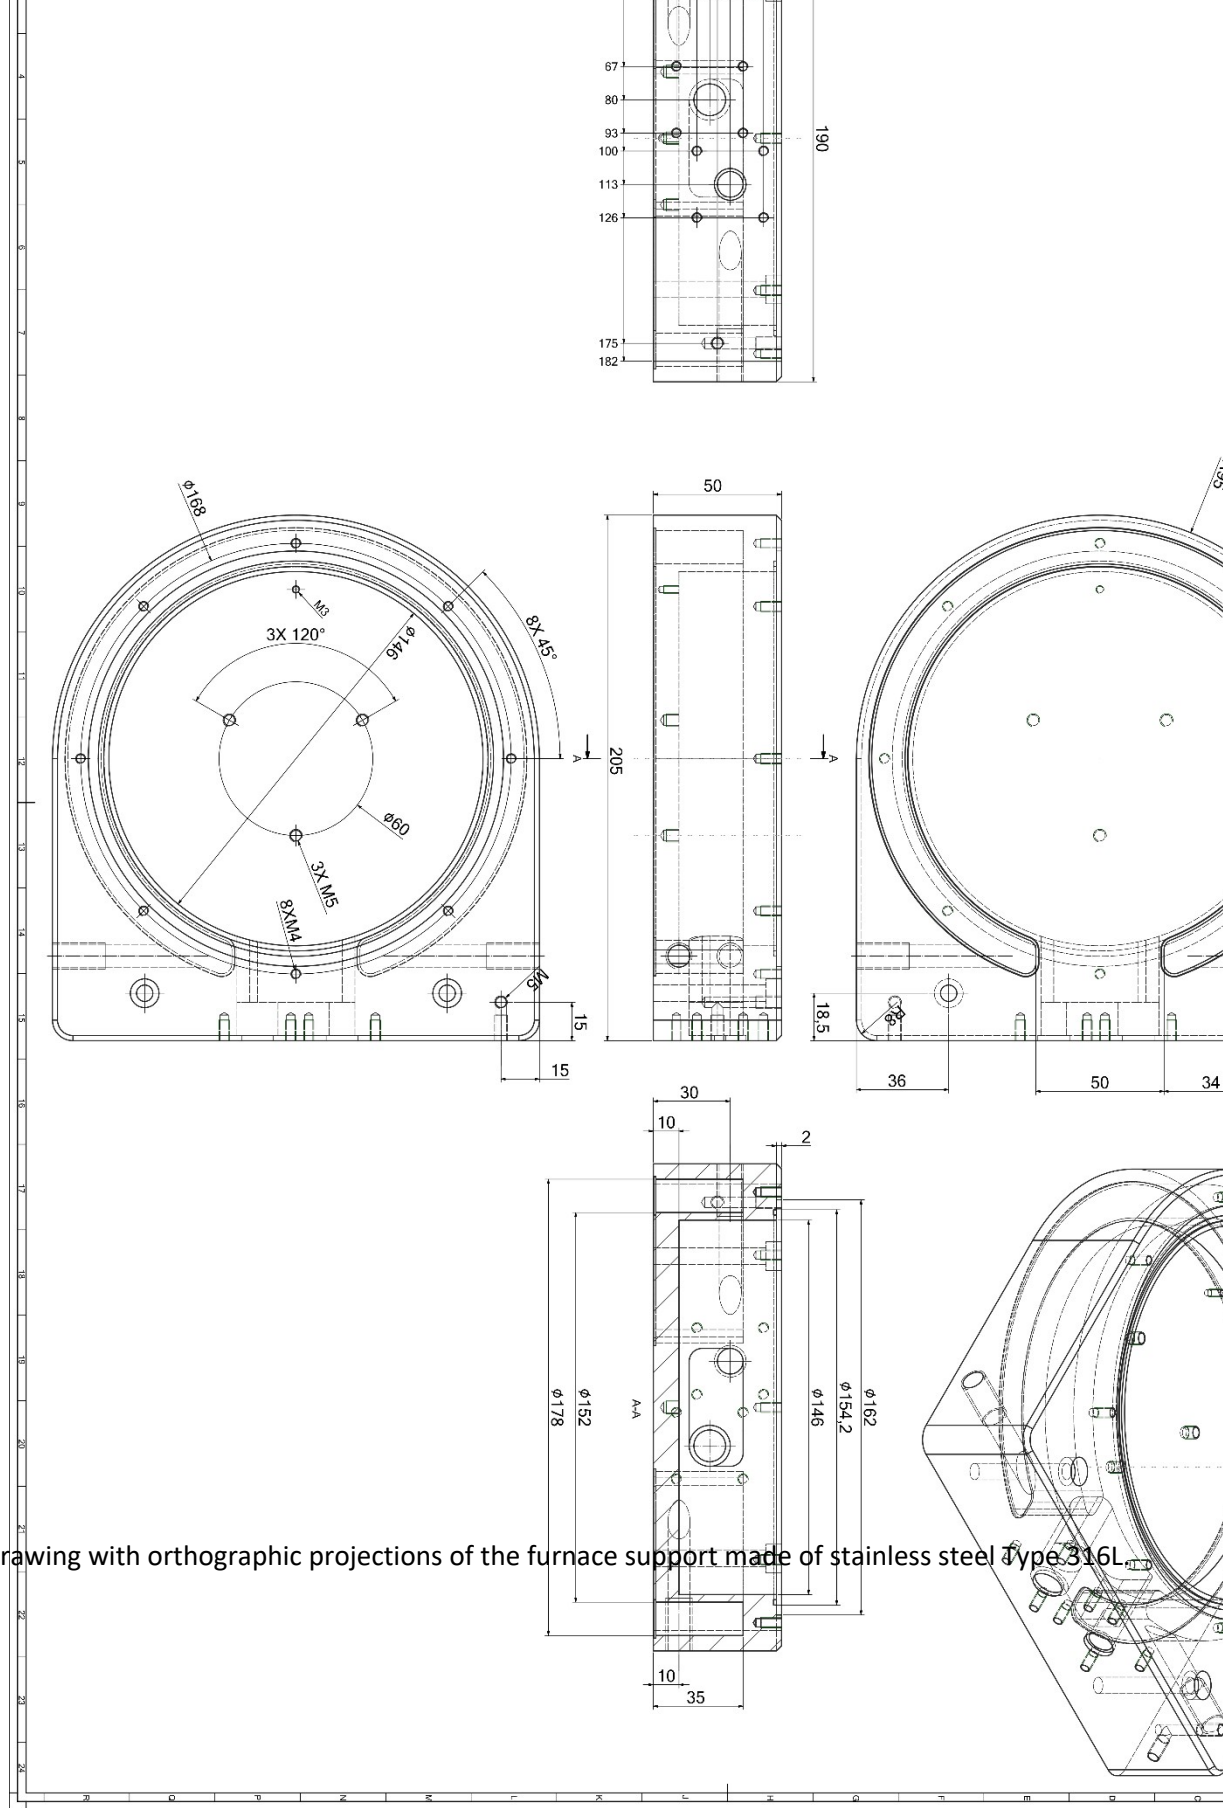

Figure S1 – Technical drawing with orthographic projections of the furnace support made of stainless steel Type 316L.

**Table S1** – Results of the peak fitting and minimization Matlab routine as platinum lattice parameters with standard deviations for heating and cooling measurements.

| Temperature [°C] | Ramp    | Pt Lattice Parameter [Å] |
|------------------|---------|--------------------------|
| 20               | Heating | 3.9222 ± 0.0004          |
| 50               | Heating | 3.9232 ± 0.0001          |
| 100              | Heating | 3.9250 ± 0.0003          |
| 150              | Heating | 3.9266 ± 0.0003          |
| 200              | Heating | 3.9287 ± 0.0003          |
| 250              | Heating | 3.9306 ± 0.0002          |
| 300              | Heating | 3.9323 ± 0.0002          |
| 350              | Heating | 3.9343 ± 0.0001          |
| 400              | Heating | 3.9360 ± 0.0001          |
| 450              | Heating | 3.9382 ± 0.0002          |
| 500              | Heating | 3.9402 ± 0.0001          |
| 550              | Heating | 3.9422 ± 0.0001          |
| 600              | Heating | 3.9443 ± 0.0001          |
| 650              | Heating | 3.9465 ± 0.0001          |
| 700              | Heating | 3.9486 ± 0.0001          |
| 750              | Heating | 3.9508 ± 0.0001          |
| 800              | Heating | 3.9532 ± 0.0001          |
| 850              | Heating | 3.9554 ± 0.0001          |
| 600              | Cooling | 3.9446 ± 0.0001          |
| 400              | Cooling | 3.9364 ± 0.0001          |
| 200              | Cooling | 3.9284 ± 0.0001          |
| 50               | Cooling | 3.9227 ± 0.0001          |

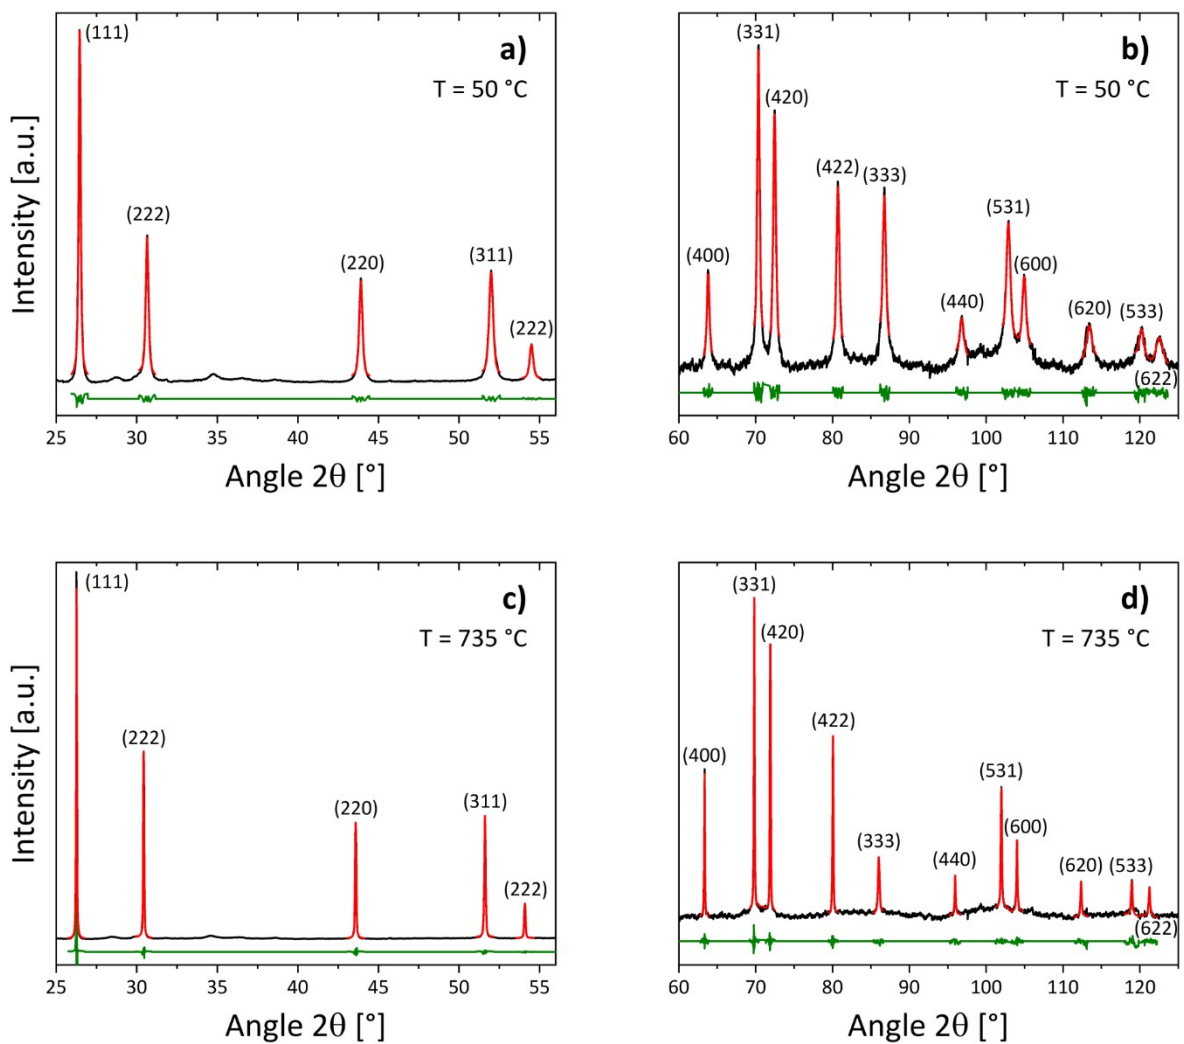

**Figure S2.** XRD diffractograms collected in the center (coordinates:  $X = 0$ ;  $Y = 0$  mm) of the Pt-coated Si(100) wafer inside the furnace mounted at the DiffAbs beamline of the Soleil synchrotron. The measurements are performed using the PEEK dome at 50 °C (a and b) and 735 °C (c and d) with experimental data (black line), fitted curves (red line), and the residuals (green line). The Miller indices of the first 16 reflections are reported. The scale is different among all 4 panels.

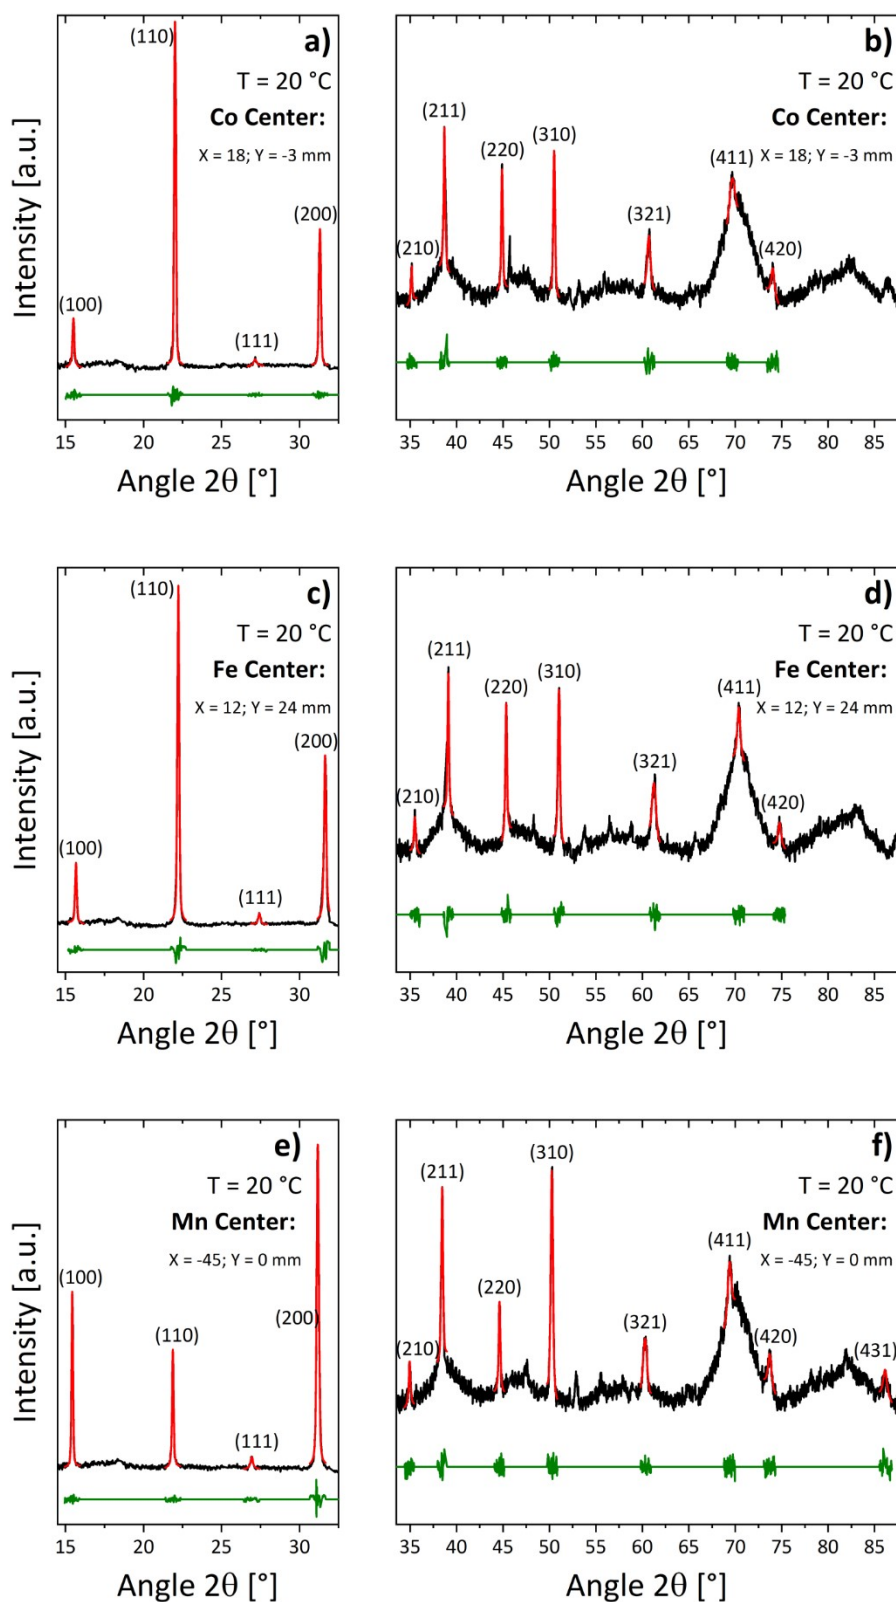

**Figure S3.** XRD diffractograms collected in the Co (a and b, sample coordinates:  $X = 18; Y = -3\text{ mm}$ ), Fe (c and d, sample coordinates:  $X = 12; Y = 24\text{ mm}$ ), and Mn (e and f, sample coordinates:  $X = -45; Y = 0\text{ mm}$ ) of the combinatorial  $\text{La}_{0.8}\text{Sr}_{0.2}\text{Co}_{1-x-y}\text{Fe}_x\text{Mn}_y\text{O}_{3-\delta}$  (LSCFM) library at the DiffAbs beamline of the Soleil synchrotron at room temperature ( $20\text{ }^{\circ}\text{C}$ ) without the PEEK dome with experimental data (black line), fitted curves (red line), and the residuals (green line). The Miller indices of the first 12 reflections are reported. The scale is different among all 6 panels.

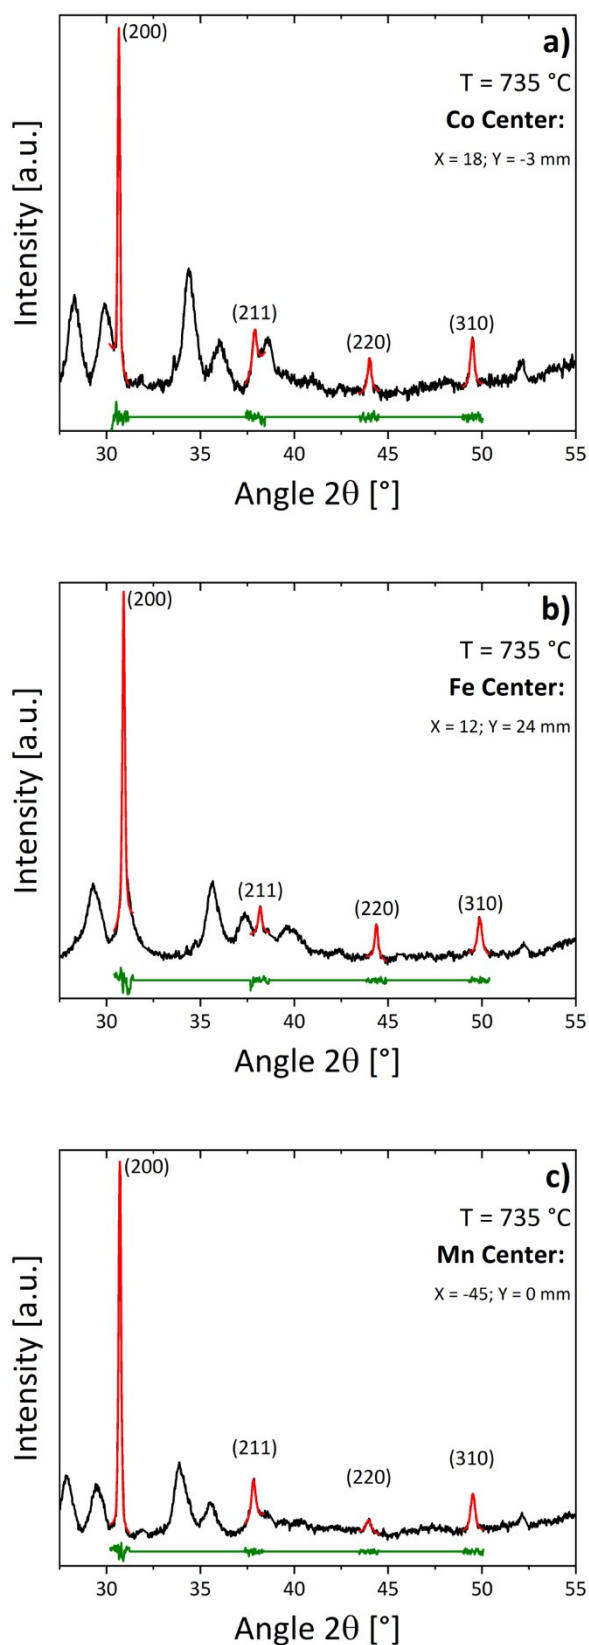

**Figure S4.** XRD diffractograms collected in the Co (a, sample coordinates:  $X = 18; Y = -3\text{ mm}$ ), Fe (b, sample coordinates:  $X = 12; Y = 24\text{ mm}$ ), and Mn (c, sample coordinates:  $X = -45; Y = 0\text{ mm}$ ) of the combinatorial  $\text{La}_{0.8}\text{Sr}_{0.2}\text{Co}_{1-x-y}\text{Fe}_x\text{Mn}_y\text{O}_{3-\delta}$  (LSCFM) library inside the furnace mounted at the DiffAbs beamline of the Soleil synchrotron. The measurements are performed using the PEEK dome at  $735\text{ }^\circ\text{C}$

with experimental data (black line), fitted curves (red line), and the residuals (green line). The Miller indices of the 4 fitted reflections of LSCFM are reported. The extra peaks are related to the PEEK polymer reflections, which strongly shift due to the variation of the contact point between the beam and the dome. The main PEEK reflections are not visible because they are at lower angular positions: the (110) at  $\approx 14^\circ 2\theta$ , (113) at  $\approx 15^\circ 2\theta$ , (220) at  $\approx 17^\circ 2\theta$ , and (213) at  $\approx 21^\circ 2\theta$ . The scale is different among all 3 panels.

**Table S2** – Results of the *in situ* XRD high-temperature measurements on the Pt-coated wafer: Pt lattice parameter is expressed in Å, while the temperatures are in °C.

| Setpoint temperature | Thermocouple temperature | Dome temperature | Pt lattice parameter | Minimum temperature | Mean temperature | Maximum temperature |
|----------------------|--------------------------|------------------|----------------------|---------------------|------------------|---------------------|
| 20                   | 20.0                     | 20.0             | 3.9219               | 6.6                 | 19.0             | 31.0                |
| 50                   | 43.6                     | 24.7             | 3.9223               | 17.1                | 31.0             | 44.9                |
| 100                  | 84.7                     | 28.1             | 3.9237               | 54.6                | 70.7             | 83.8                |
| 200                  | 168.1                    | 37.3             | 3.9268               | 139.3               | 154.3            | 165.1               |
| 250                  | 208.9                    | 42.5             | 3.9287               | 192.0               | 204.8            | 217.8               |
| 300                  | 249.1                    | 48.5             | 3.9304               | 239.2               | 251.0            | 265.1               |
| 350                  | 288.6                    | 52.5             | 3.9321               | 284.0               | 296.0            | 309.0               |
| 400                  | 327.2                    | 59.3             | 3.9338               | 324.1               | 338.8            | 353.6               |
| 450                  | 365.2                    | 67.2             | 3.9355               | 357.2               | 381.8            | 398.5               |
| 500                  | 402.8                    | 71.0             | 3.9371               | 395.7               | 422.2            | 443.1               |
| 550                  | 439.3                    | 86.3             | 3.9390               | 430.3               | 468.6            | 493.0               |
| 600                  | 476.6                    | 113.5            | 3.9405               | 467.2               | 505.9            | 530.7               |
| 650                  | 509.7                    | 107.5            | 3.9421               | 500.7               | 545.3            | 578.1               |
| 700                  | 545.7                    | 133.3            | 3.9439               | 543.6               | 586.7            | 625.3               |
| 735                  | 570.5                    | 139.4            | 3.9451               | 571.4               | 616.3            | 652.8               |

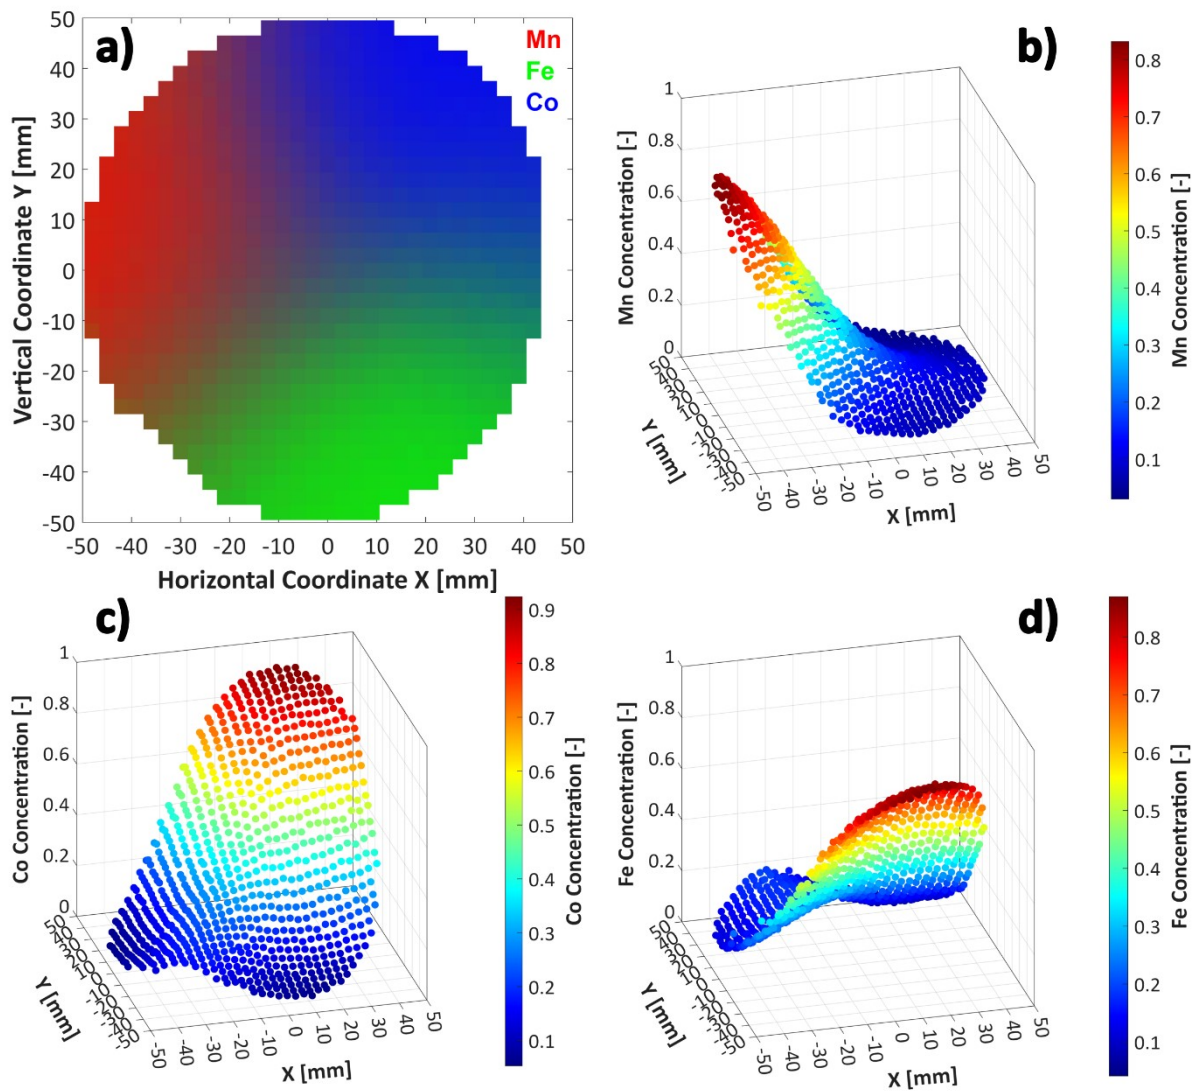

**Figure S5.** Element concentration measured by X-ray fluorescence (XRF) results reported as the RGB plot (a) with Mn in red, Fe in green, and Co in blue. The same results are presented as single element 3D distributions for Mn (b), Co (c), and Fe (d).
